# Supplementary material for: Lead-free new alkali metals double perovskites A2InAgF6 (A = Na, K, and Rb) for optoelectronic applications: a first-principles study
Source: Royal Society of Chemistry journal article supplement (doi:10.1039/d6ra01318j), 2026-04-22
Supplement: d6ra01318j1.pdf [file d6ra01318j1.pdf]

## Lead-Free New Alkali Metals Double Perovskites $A_2\text{InAgF}_6$ ( $A = \text{Na}, \text{K},$ and $\text{Rb}$ ) for Optoelectronic Applications: A First-Principles Study

Sharmin Islam<sup>a</sup>, Shatha A. Aldaghfag<sup>b</sup>, Ali El-Rayyes<sup>c</sup>, Abdullah Al Mahmud<sup>a</sup>, Samah Saidi<sup>d</sup>, Omar Alsalmi<sup>e</sup>, Mohd Taukeer Khan<sup>f\*</sup>, Md Saiduzzaman<sup>a\*</sup>

<sup>a</sup>Department of Materials Science and Engineering, Khulna University of Engineering & Technology, Khulna 9203, Bangladesh

<sup>b</sup>Department of Physics, College of Sciences, Princess Nourah bint Abdulrahman University, P. O. Box 84428, Riyadh 11671, Saudi Arabia

<sup>c</sup>Center for Scientific Research and Entrepreneurship, Northern Border University, 73213, Arar, Saudi Arabia

<sup>d</sup>Department of Physics, College of Science and Humanities in Al-Kharj, Prince Sattam Bin Abdulaziz University, Al-Kharj 11942, Saudi Arabia

<sup>e</sup>Department of Physics, College of Science, Umm Al-Qura University, Makkah, 21955, Saudi Arabia

<sup>f</sup>Department of Physics, Faculty of Science, Islamic University of Madinah, Madinah, Saudi Arabia

\* **Corresponding author:** Md Saiduzzaman (Email: msaiduzzaman@mse.kuet.ac.bd)  
Mohd Taukeer Khan (Email: khanmtk@iu.edu.sa)

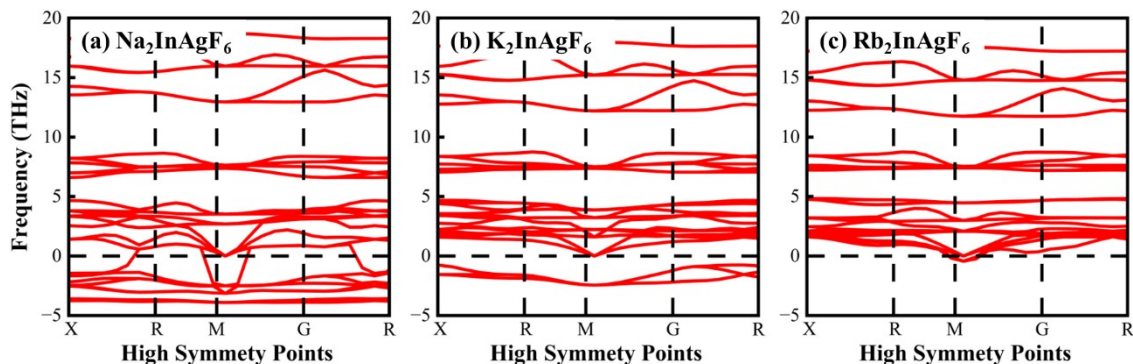

**Fig. S1** Phonon dispersion spectra of  $A_2\text{InAgF}_6$  ( $A = \text{Na}, \text{K},$  and  $\text{Rb}$ ) compounds
